# Supplementary material for: Inorganic salt-assisted hydrothermal synthesis and excellent visible light-driven photocatalytic performance of 3D MnNb2O6flower-like nanostructures
Source: Royal Society of Chemistry journal article supplement (doi:10.1039/c4ce00996g), 2014-06-20
Supplement: c4ce00996g1.pdf [file c4ce00996g1.pdf]

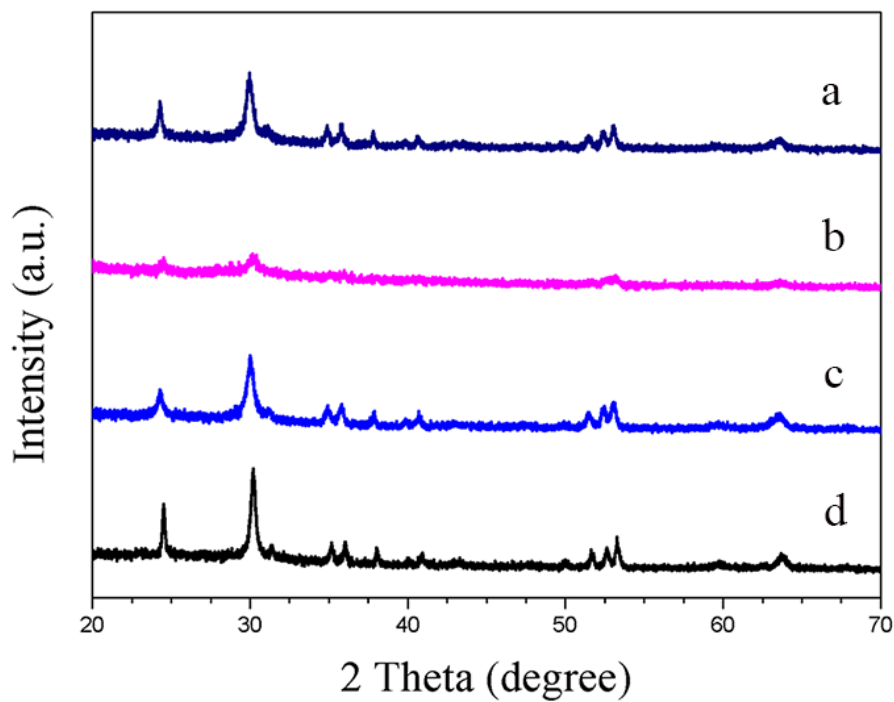

**Fig. S1.** XRD patterns of the samples prepared by hydrothermal treatment at 260 °C for 24 h with different organic additives: (a) 1g K<sub>2</sub>SO<sub>4</sub> (b) 1g NaNO<sub>3</sub> (c) 1g NaCl (d) 1g Na<sub>2</sub>SO<sub>4</sub>

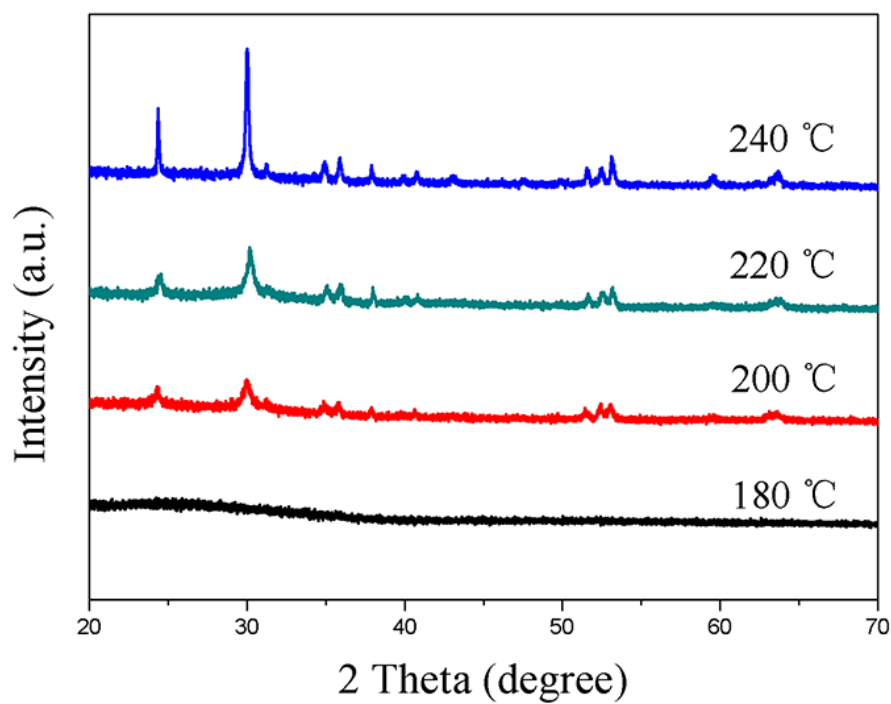

**Fig. S2.** XRD patterns of the samples prepared by hydrothermal treatment at different reaction temperature

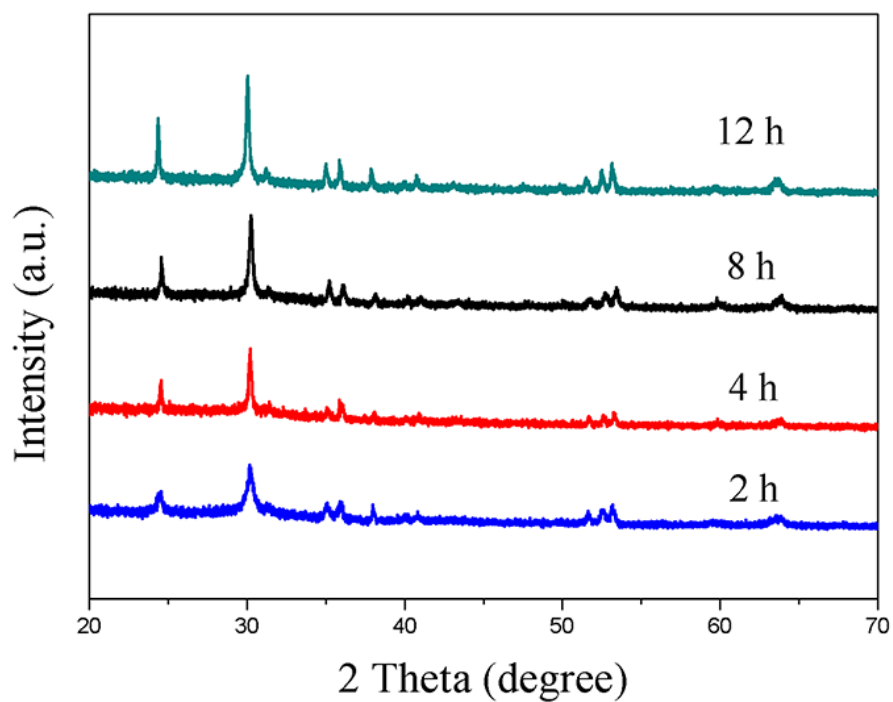

**Fig. S3.** XRD patterns of the  $\text{MnNb}_2\text{O}_6$  samples prepared by hydrothermal treatment at different reaction time

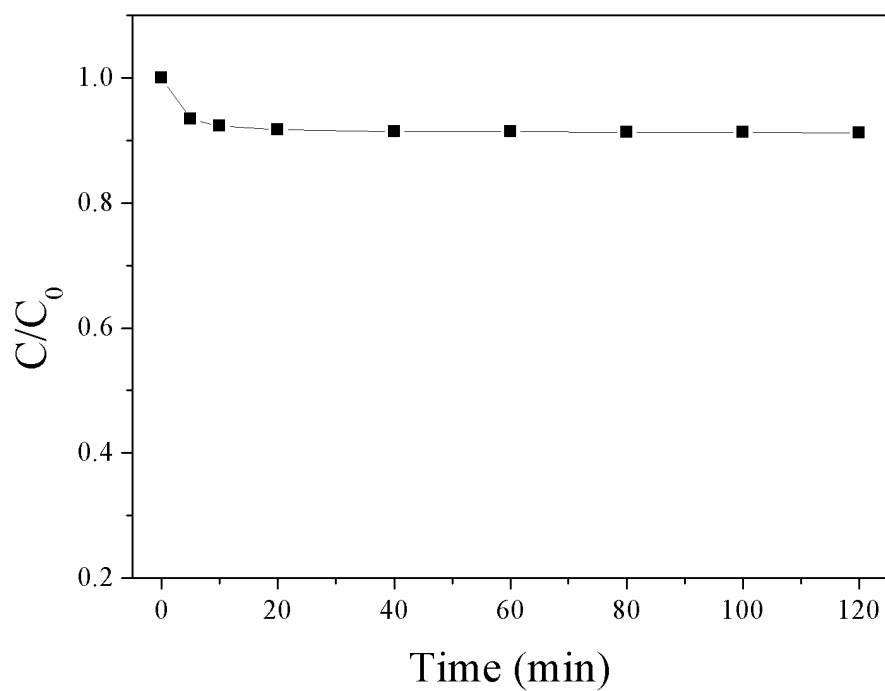

**Fig. S4.** The adsorption curve of the  $\text{MnNb}_2\text{O}_6$  3D flower-like nanostructures for 120 min in the dark.

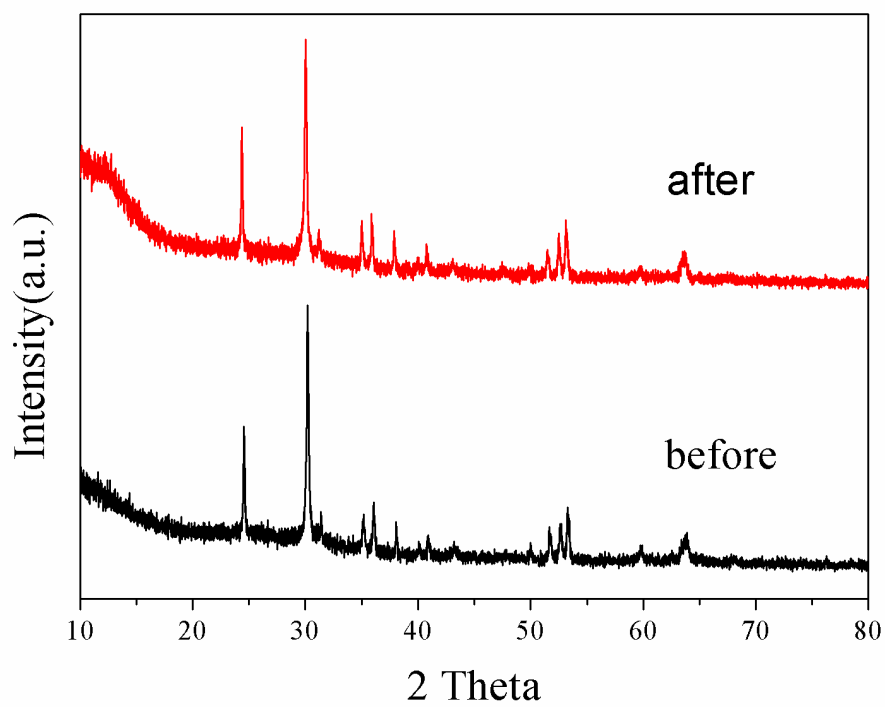

**Fig. S5.** XRD patterns of the MnNb<sub>2</sub>O<sub>6</sub> 3D flower-like nanostructures before and after photocatalytic reaction.
